# Supplementary material
Source: publisher figshare collection journal article supplement (https://rs.figshare.com/ndownloader/files/11194940)
Supplement: Supplementary file [file 11194940]

Table S1: Comparison of predicted FliM<sub>M</sub> complexes with reported cross-link signals.

| pair   | distance C $\alpha$ -C $\alpha$ (Å) |          |
|--------|-------------------------------------|----------|
|        | Model I                             | Model II |
| 57/94  | 16.4                                | 5.9      |
| 57/185 | 8.0                                 | 14.7     |
| 57/187 | 5.9                                 | 14.2     |
| 64/94  | 17.0                                | 5.9      |
| 64/185 | 6.7                                 | 5.8      |
| 64/187 | 12.3                                | 5.7      |
| 77/185 | 15.7                                | 8.3      |

Comparison of predicted FliM<sub>M</sub> complexes with reported cross-link signals.
